# Supplementary material for: Bismuth telluride functionalized bismuth oxychloride used for enhancing antibacterial activity and wound healing efficacy with sunlight irradiation
Source: Royal Society of Chemistry journal article supplement (doi:10.1039/d1bm01514a), 2021-11-26
Supplement: d1bm01514a1.pdf [file d1bm01514a1.pdf]

## **Bismuth telluride functionalized bismuth oxychloride used for enhanced antibacterial and wound healing efficacy with sunlight irradiation**

Rui Chen,<sup>\*a</sup> Liqi Wei,<sup>\*b</sup> Yan Yan,<sup>a</sup> Guoli Chen,<sup>a</sup> Xiaodong Yang,<sup>a</sup> Yang Liu,<sup>a</sup> Mengyuan Zhang,<sup>a</sup> Xin Liu,<sup>b</sup> Yan Cheng,<sup>\*b</sup> Jun Sun<sup>c</sup> and Lili Wang<sup>\*a</sup>

<sup>a</sup> College of Science, Jilin Provincial Key Laboratory of Human Health Status Identification and Function Enhancement, Changchun University, Changchun, 130022, P.R. China

<sup>b</sup> Engineering Research Center of Bioreactor and Pharmaceutical Development, Ministry of Education, College of Life Science, Jilin Agricultural University, Changchun, 130118, P.R. China

<sup>c</sup> Modern Economic System Research Center, Jilin Business and Technology College, Changchun, 130507, P.R. China

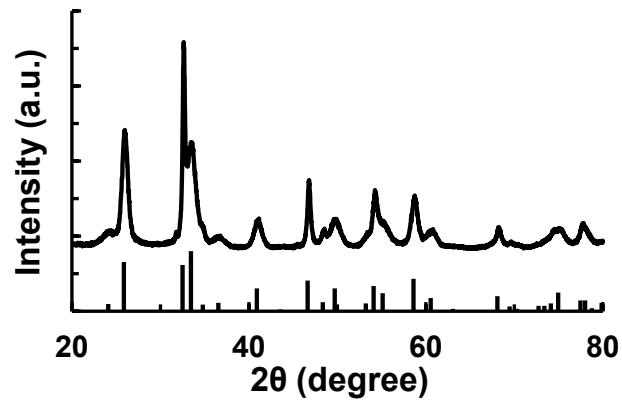

**Figure S1.** XRD pattern of BiOCl NSs.

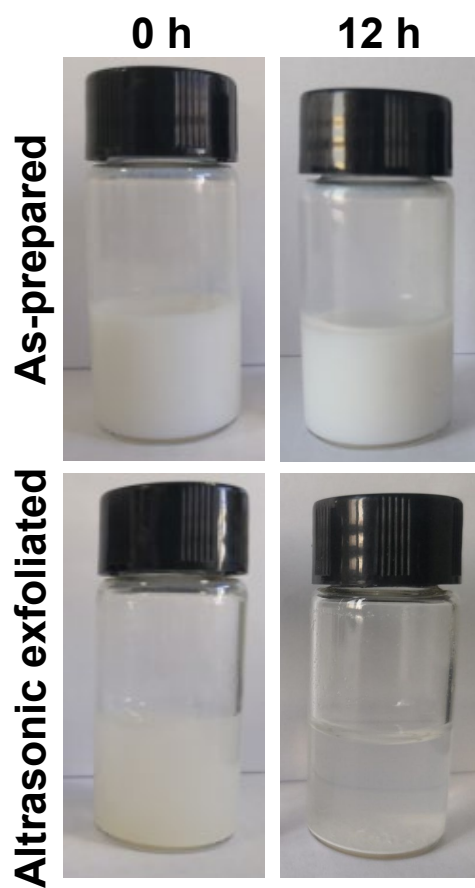

**Figure S2.** Photos of as-prepared and ultrasonic exfoliated BiOCl NS-aqueous solutions before and after storing for 12 h.

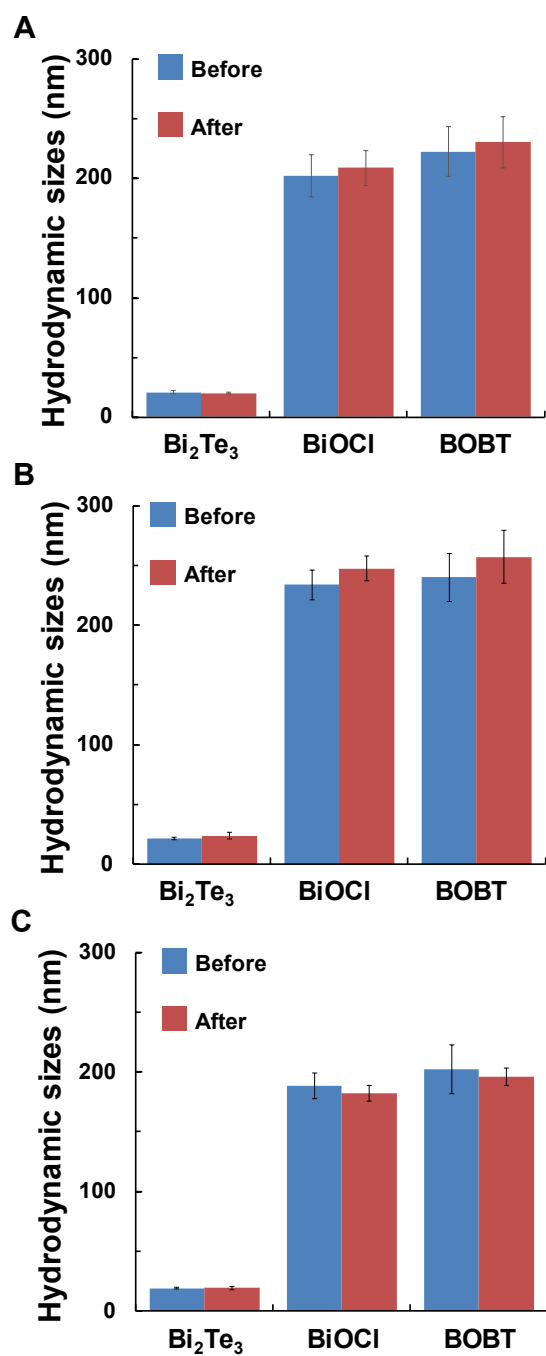

**Figure S3.** Hydrodynamic sizes of  $\text{Bi}_2\text{Te}_3$ ,  $\text{BiOCl}$  and  $\text{BOBT}$  NSs dispersed in PBS (A), NaCl (B), and PBS (C) solutions before and after storing for one week.

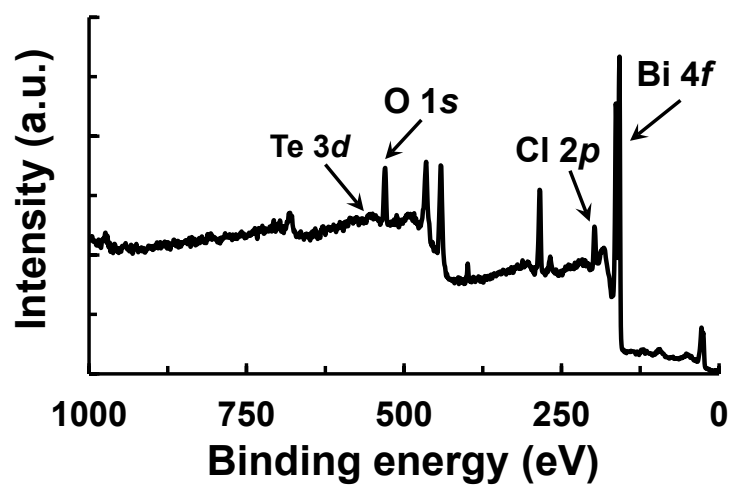

Figure S4. XPS survey spectrum of BOBT NSs.

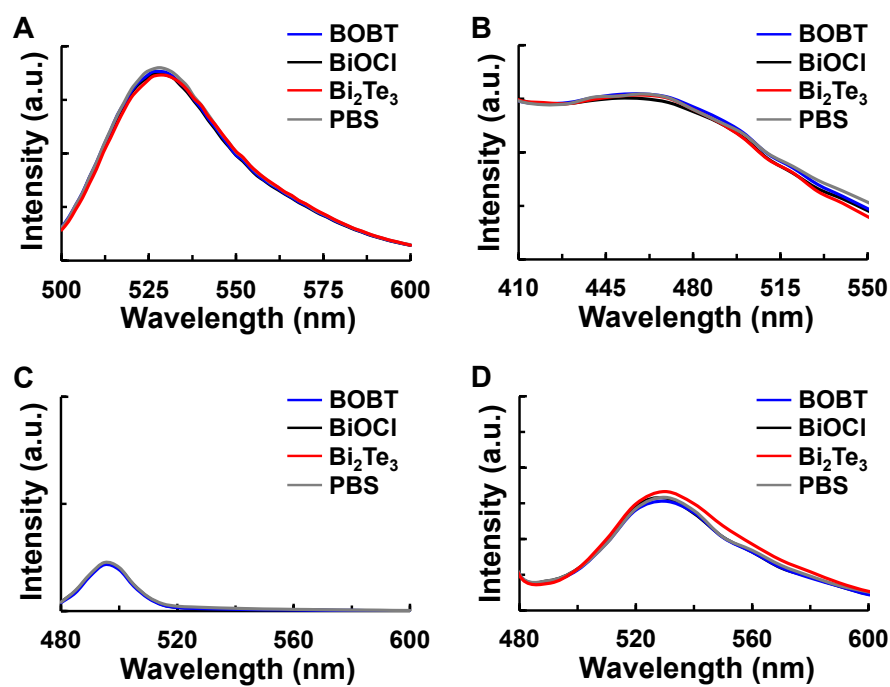

**Figure S5.** (A) DCF Fluorescence emission spectra (A) for total ROS detection; (B-C) XTT absorption, APF and SOSG fluorescence spectra for O<sub>2</sub>•<sup>-</sup> (B), OH• (C), <sup>1</sup>O<sub>2</sub> (D) detection. All detection agents were incubated with PBS, Bi<sub>2</sub>Te<sub>3</sub> (10 μg mL<sup>-1</sup>), BiOCl (90 μg mL<sup>-1</sup>), and BOBT NSs (100 μg mL<sup>-1</sup>) without SSR.

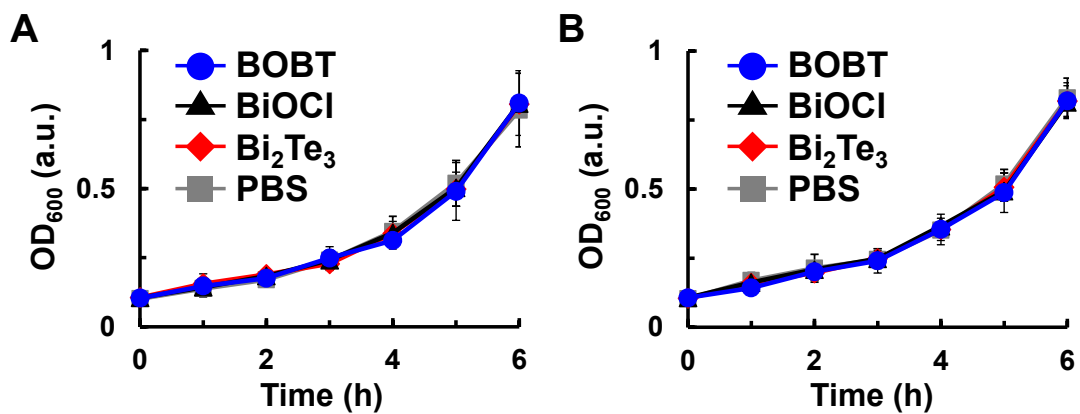

**Figure S6.** The bacteria growth curves of *E. coli* (A) and *S. aureus* (B) incubated with PBS, Bi<sub>2</sub>Te<sub>3</sub> (40  $\mu\text{g mL}^{-1}$ ), BiOCl (360  $\mu\text{g mL}^{-1}$ ) and BOBT NSs (400  $\mu\text{g mL}^{-1}$ ) without SSR (n = 3).

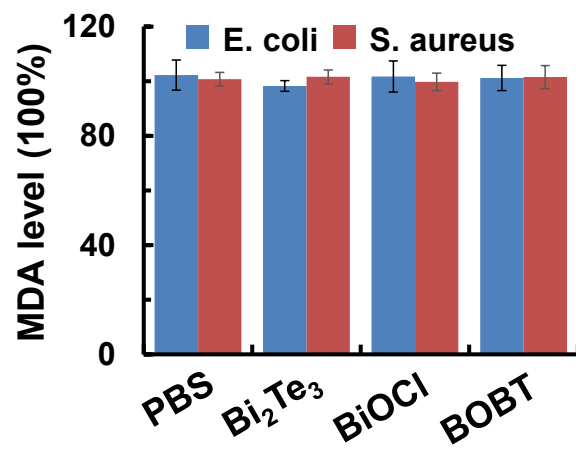

**Figure S7.** MDA levels of bacteria after treating with PBS, Bi<sub>2</sub>Te<sub>3</sub> (40 µg mL<sup>-1</sup>), BiOCl (360 µg mL<sup>-1</sup>) and BOBT NSs (400 µg mL<sup>-1</sup>) without SSR (n = 3).



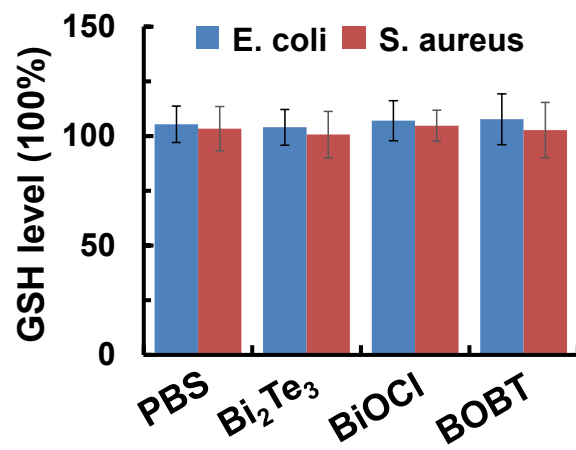

**Figure S8.** GSH levels of bacteria after treating with PBS,  $\text{Bi}_2\text{Te}_3$  ( $40 \mu\text{g mL}^{-1}$ ),  $\text{BiOCl}$  ( $360 \mu\text{g mL}^{-1}$ ) and BOBT NSs ( $400 \mu\text{g mL}^{-1}$ ) without SSR ( $n = 3$ ).

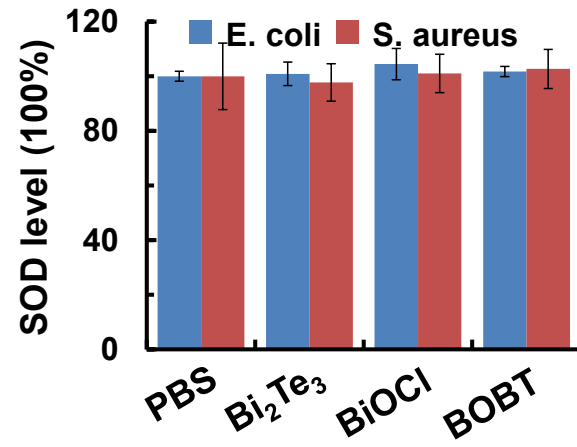

**Figure S9.** SOD activities of bacteria after treating with PBS, Bi<sub>2</sub>Te<sub>3</sub> (40 µg mL<sup>-1</sup>), BiOCl (360 µg mL<sup>-1</sup>) and BOBT NSs (400 µg mL<sup>-1</sup>) without SSR (n=3).

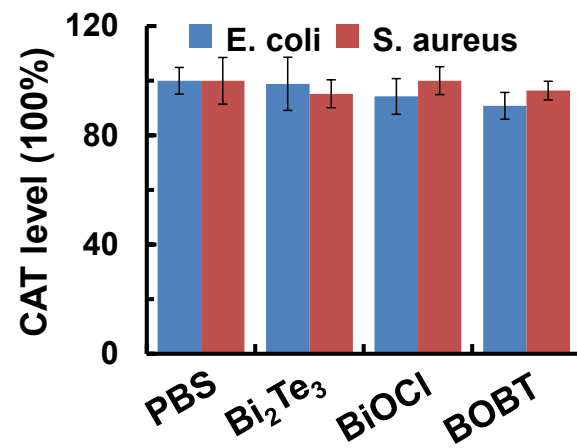

**Figure S10.** CAT activities of bacteria after treating with PBS,  $\text{Bi}_2\text{Te}_3$  ( $40 \mu\text{g mL}^{-1}$ ),  $\text{BiOCl}$  ( $360 \mu\text{g mL}^{-1}$ ) and BOBT NSs ( $400 \mu\text{g mL}^{-1}$ ) without SSR ( $n=3$ ).

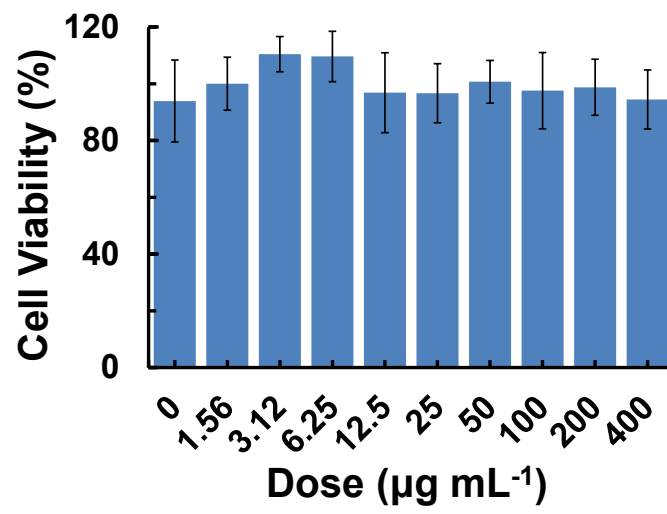

**Figure S11.** Cell viability of 3T3 cells treated with BOBT NSs (0-400 µg mL<sup>-1</sup>) (n = 3).

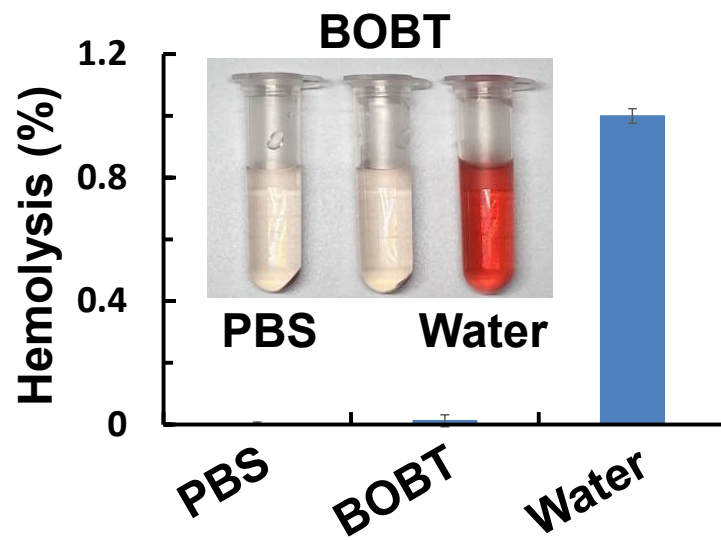

**Figure S12.** Hemolytic assay of mouse red blood cell by BOBT NSs ( $400 \mu\text{g mL}^{-1}$ ). PBS and water were used as negative and positive control ( $n = 3$ ).

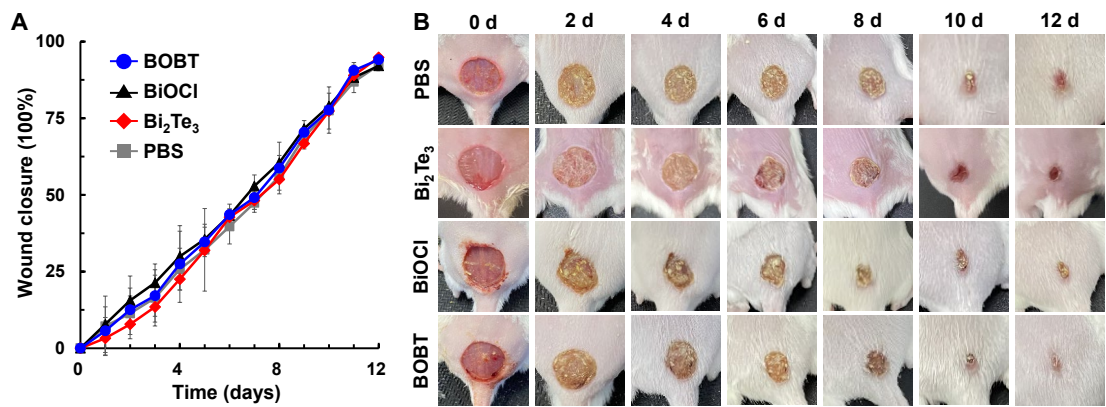

**Figure S13.** Wound closure rates (A) and the representative photos of wound site (B) after being treated with PBS, BiOCl and BOBT NSs without SSR (n = 3).
